# Supplementary material
Source: publisher figshare collection journal article supplement (https://acs.figshare.com/ndownloader/files/5128225)
Supplement: Supplementary file 1 [file 5128225]

## SUPPORTING INFORMATION

### Supramolecular Metallomesogens: Hydrogen-Bonded Ferrocene-Containing Liquid Crystals which Display Bicontinuous Cubic Phases

Philippe Massiot,<sup>†</sup> Marianne Impérator-Clerc,<sup>‡</sup> Michèle Veber\*<sup>‡</sup> and Robert Deschenaux\*<sup>‡</sup>

<sup>†</sup>Institut de Chimie, Université de Neuchâtel, Avenue de Bellevaux 51, Case Postale 2, 2007 Neuchâtel, Switzerland, and <sup>‡</sup>Laboratoire de Physique des Solides, Bâtiment 510, Université Paris Sud, 91405 Orsay Cedex, France

Correspondence to: robert.deschenaux@unine.ch

#### Experimental Section

**Materials:** Diethyl ether (LiAlH<sub>4</sub>, under N<sub>2</sub>), CH<sub>2</sub>Cl<sub>2</sub> (P<sub>2</sub>O<sub>5</sub>, under N<sub>2</sub>), toluene (NaH, under N<sub>2</sub>) and THF (sodium, benzophenone, under N<sub>2</sub>) were distilled prior to use. Malonic acid (Fluka), N,N'-dicyclohexylcarbodiimide (Fluka), 4-pyrrolidinopyridine (Aldrich), anhydrous AlCl<sub>3</sub> (Fluka), LiAlH<sub>4</sub> (Fluka), DMF (SDS, analytical grade), POCl<sub>3</sub> (Fluka), decanoyl chloride (Fluka), dodecanoyl chloride (Fluka), 4-hydroxybenzoic acid benzylester (Fluka) and ferrocene (Chemische Betriebe Pluto/Veba Oel) were used as received. Pyridine (Fluka) and piperidine (Fluka) were stored on 4 Å on molecular sieves. Compounds **3a**, **4a**, **5a** and **6a** were synthesized as reported previously.<sup>43</sup>

**Techniques:** Column chromatography: silica gel 60 (0.060-0.200 mm, SDS). Transition temperatures (onset point) and enthalpies were determined with a differential scanning Mettler DSC 822 calorimeter, under N<sub>2</sub>/He, at a rate of 10°C/min. Optical studies were conducted using a Zeiss-Axioscope polarizing microscope equipped with a Linkam-THMS-600 variable-temperature stage, under N<sub>2</sub>. <sup>1</sup>H NMR spectra were recorded on a Varian GEMINI 200 spectrometer or a Bruker AMX 400 spectrometer (solvent as an internal standard). Mass spectra (ESI) were recorded on a Finnigan LCQ. Elemental analyses were done by Mikroelementaranalytisches Laboratorium ETH-Zurich or Laboratoire de chimie pharmaceutique et organique propédeutique, Université de Genève.

**X-ray Diffraction studies:** Experiments were performed on a rotating anode generator. The copper K $\alpha$  wavelength (0.154 nm) was selected with a OSMIC graded multilayer monochromator and a circular collimator (diameter 1 mm) was used. Detection was performed on a CCD camera (Princeton Instruments) at 460  $\pm$  5 mm from the sample. The samples were introduced into Lindemann capillaries (diameter 1 mm) sealed at both ends. Capillaries were held inside a home-made oven (not calibrated). In the case of **2a**, a measurement has been performed on an image-plate detector (distance sample-detection : 406 mm) using synchrotron radiation (wavelength 0.145 nm) at the D43 beamline at LURE (Orsay, France).

**Abbreviations:** N,N'-dicyclohexylcarbodiimide = DCC; 4-pyrrolidinopyridine = 4-PPy; dimethylformamide = DMF; column chromatography = CC.

## Syntheses.

**Compound 3b:** A mixture of  $\text{AlCl}_3$  (15.1 g, 113.24 mmol) and decanoyl chloride (20.5 g, 107.5 mmol) was added to a stirred solution of ferrocene (10.0 g, 53.75 mmol) in  $\text{CH}_2\text{Cl}_2$  (200 mL). The mixture was stirred under reflux for 2h, cooled to room temperature and poured onto ice. The organic layer was separated, dried ( $\text{MgSO}_4$ ) and evaporated to dryness. Purification of the residue by two crystallizations (hexane) gave pure **3b** (21.8 g, 82%). Mp =  $69^\circ\text{C}$ .  $^1\text{H}$  RMN (200 MHz, acetone- $d_6$ ):  $\delta$  = 0.90 (t, 6H,  $\text{CH}_3$ ), 1.25-1.45 (m, 24H, 12 x  $\text{CH}_2$ ), 1.60-1.75 (m, 4H,  $\text{CH}_2\text{CH}_2\text{COCp}$ ), 2.75 (t, 4H,  $\text{CH}_2\text{COCp}$ ), 4.58 (t, 4H, H-Cp), 4.83 (t, 4H, H-Cp). Anal. Calcd for  $\text{C}_{30}\text{H}_{46}\text{O}_2\text{Fe}$  (494.53): C, 72.86; H, 9.38. Found: C, 72.79; H, 9.38.

**Compound 3c:** As for **3b** from dodecanoyl chloride. Purification of the residue by CC ( $\text{CH}_2\text{Cl}_2$ ) followed by crystallization (heptane/ $\text{AcOEt}$ ) gave pure **3c** (77%). Mp =  $77^\circ\text{C}$ .  $^1\text{H}$  RMN (200 MHz,  $\text{CDCl}_3$ ):  $\delta$  = 0.89 (t, 6H,  $\text{CH}_3$ ), 1.27-1.33 (m, 32H, 16 x  $\text{CH}_2$ ), 1.65-1.73 (m, 4H,  $\text{CH}_2\text{CH}_2\text{COCp}$ ), 2.65 (t, 4H,  $\text{CH}_2\text{COCp}$ ), 4.48 (t, 4H, H-Cp), 4.78 (t, 4H, H-Cp). Anal. Calcd for  $\text{C}_{34}\text{H}_{54}\text{O}_2\text{Fe}$  (438.43): C, 74.17; H, 9.88. Found: C, 74.09; H, 9.71.

**Compound 4b:** To a suspension of  $\text{LiAlH}_4$  (3.63 g, 95.64 mmol) and diethyl ether (200 mL) cooled to  $0^\circ\text{C}$  and kept under  $\text{N}_2$ , was added portionwise  $\text{AlCl}_3$  (12.78 g, 95.84 mmol). A solution of **3b** (21.53 g, 43.53 mmol) in diethyl ether (500 mL) was added. The mixture was stirred for 15 min and cautiously poured onto ice. The organic layer was separated and the aqueous phase extracted with diethyl ether. The organic layers were combined, washed successively with a saturated aqueous  $\text{NaHCO}_3$  solution and a saturated aqueous  $\text{NaCl}$  solution, dried ( $\text{MgSO}_4$ ) and evaporated to dryness. Purification of the residue by CC (diethyl ether) gave pure **4b** (19.66 g, 97%, oil).  $^1\text{H}$  RMN (400 MHz, acetone- $d_6$ ):  $\delta$  = 0.90 (t, 6H,  $\text{CH}_3$ ); 1.20-1.35 (m, 28H, 14 x  $\text{CH}_2$ ); 1.48-1.54 (m, 4H,  $\text{CH}_2\text{CH}_2\text{Cp}$ ); 2.35 (m, 4H,  $\text{CH}_2\text{Cp}$ ); 3.98 (m, 8H, H-Cp). Anal. Calcd for  $\text{C}_{30}\text{H}_{50}\text{Fe}$  (466.57): C, 77.23; H, 10.80. Found: C, 77.18; H, 10.79.

**Compound 4c:** As for **4b** from **3c** in toluene. Purification of the residue by CC (diethyl ether) gave pure **4c** (97%, oil).  $^1\text{H}$  RMN (400 MHz, acetone- $d_6$ ):  $\delta$  = 0.89 (t, 6H,  $\text{CH}_3$ ), 1.20-1.35 (m, 36H, 18 x  $\text{CH}_2$ ), 1.48-1.54 (m, 4H,  $\text{CH}_2\text{CH}_2\text{Cp}$ ), 2.29 (m, 4H,  $\text{CH}_2\text{Cp}$ ), 3.98 (m, 8H, H-Cp).

**Compound 5b:** To a solution of **4b** (19.43 g, 41.64 mmol) in  $\text{CH}_2\text{Cl}_2$  (200 mL) heated under reflux, was added dropwise a solution of  $\text{POCl}_3$  (14.11 g, 92.02 mmol) and DMF (12.23 g, 167.32 mmol) in  $\text{CH}_2\text{Cl}_2$  (50 mL). The solution was stirred under reflux for 18h, cooled to room temperature and poured onto ice.  $\text{K}_2\text{CO}_3$  (60 g) was added portionwise and the mixture was stirred for 1h.  $\text{CH}_2\text{Cl}_2$  (100 mL) was added and the organic layer separated. The aqueous phase was extracted with  $\text{CH}_2\text{Cl}_2$  (2 x 50 mL). The organic layers were combined, washed with water, dried ( $\text{MgSO}_4$ ) and evaporated to dryness. Purification of the residue by CC ( $\text{CH}_2\text{Cl}_2$ ) gave pure **5b** (7.73 g, 38%, oil).  $^1\text{H}$  RMN (400 MHz, acetone- $d_6$ ):  $\delta$  = 0.88 (t, 6H,  $\text{CH}_3$ ), 1.20-1.35 (m, 28H, 14 x  $\text{CH}_2$ ), 1.45-1.57 (m, 4H,  $\text{CH}_2\text{CH}_2\text{Cp}$ ), 2.28 (m, 2H,  $\text{CH}_2\text{Cp}$ ), 2.40-2.45 (m, 2H,  $\text{CH}_2\text{Cp}(\text{CHO})$ ), 4.11 (m, 4H, H-Cp), 4.51 (m, 1H, H-Cp), 4.62-4.64 (m, 2H, H-Cp), 9.86 (s, 1H, CHO).

**Compound 5c:** As for **5b** from **4c**. Purification of the residue by CC (CH<sub>2</sub>Cl<sub>2</sub>) gave pure **5c** (38%, oil). <sup>1</sup>H RMN (200 MHz, CDCl<sub>3</sub>): δ = 0.88 (t, 6H, CH<sub>3</sub>), 1.26-1.56 (m, 40H, 20 x CH<sub>2</sub>), 2.23 (t, 2H, CH<sub>2</sub>Cp), 2.37 (t, 2H, CH<sub>2</sub>Cp(CHO)), 4.08 (m, 4H, H-Cp), 4.43 (s, 1H, H-Cp), 4.58 (s, 1H, H-Cp), 4.61 (s, 1H, H-Cp), 9.88 (s, 1H, CHO).

**Compound 6b:** A solution of **5b** (7.73 g, 15.63 mmol), malonic acid (3.12 g, 30.0 mmol) and piperidine (20 drops) in pyridine (20 mL) was stirred at 55°C for 4h and at 115°C for 2h. The solution was poured onto ice and water and acidified with HCl (2 N). Diethyl ether was added. The organic layer was separated, washed with water, dried (MgSO<sub>4</sub>) and evaporated to dryness. Purification of the residue by CC (heptane/diethyl ether 2:1) gave pure **6b** (5.85 g, 70%). Mp = 45°C. <sup>1</sup>H RMN (200 MHz, acetone-d<sub>6</sub>): δ = 0.90 (t, 6H, CH<sub>3</sub>), 1.20-1.40 (m, 28H, 14 x CH<sub>2</sub>), 1.43-1.62 (m, 4H, CH<sub>2</sub>CH<sub>2</sub>Cp), 2.26-2.33 (m, 2H, CH<sub>2</sub>Cp), 2.38-2.46 (m, 2H, CH<sub>2</sub>Cp(substituted by the vinylic function)), 3.98-4.07 (m, 4H, H-Cp), 4.34-4.36 (m, 1H, H-Cp), 4.47-4.50 (m, 2H, H-Cp), 6.02 (d, 1H, vinylic proton), 7.50 (d, 1H, vinylic proton). Anal. Calcd for C<sub>33</sub>H<sub>52</sub>O<sub>2</sub>Fe (536.62): C, 73.86; H, 9.77. Found: C, 74.07; H, 9.79.

**Compound 6c:** As for **6b** from **5c**. Purification of the residue by CC (heptane/diethyl ether 1:1) gave pure **6b** (97%). Mp = 57°C. <sup>1</sup>H RMN (200 MHz, CDCl<sub>3</sub>): δ = 0.88 (t, 6H, CH<sub>3</sub>), 1.26-1.56 (m, 40H, 20 x CH<sub>2</sub>), 2.21 (t, 2H, CH<sub>2</sub>Cp), 2.34 (t, 2H, CH<sub>2</sub>Cp(substituted by the vinylic function)), 3.96-4.01 (m, 4H, H-Cp), 4.29-4.32 (m, 3H, H-Cp), 5.96 (d, 1H, vinylic proton), 7.62 (d, 1H, vinylic proton). Anal. Calcd for C<sub>37</sub>H<sub>60</sub>O<sub>2</sub>Fe (592.72): C, 74.98; H, 10.20. Found: C, 74.89; H, 10.01.

**Compound 7b:** A solution of **6b** (1.75 g, 3.26 mmol), 4-hydroxybenzoic acid benzylester (0.75 g, 3.29 mmol), DCC (1.01 g, 4.9 mmol) and 4-ppy (50 mg, 0.34 mmol) in CH<sub>2</sub>Cl<sub>2</sub> (40 mL) was stirred at room temperature for 3h. Purification of the residue by CC (CH<sub>2</sub>Cl<sub>2</sub>/AcOEt 40:1) gave pure **7b** (1.73 g, 74%, oil). <sup>1</sup>H RMN (200 MHz, acetone-d<sub>6</sub>): δ = 0.88 (t, 3H, CH<sub>3</sub>), 0.90 (t, 3H, CH<sub>3</sub>), 1.20-1.60 (m, 32H, 16 x CH<sub>2</sub>), 2.27-2.35 (m, 2H, CH<sub>2</sub>Cp), 2.41-2.49 (m, 2H, CH<sub>2</sub>Cp(substituted by the vinylic function)), 4.02-4.13 (m, 4H, H-Cp), 4.44-4.46 (m, 1H, H-Cp), 4.60-4.62 (m, 2H, H-Cp), 5.42 (s, 2H, CO<sub>2</sub>CH<sub>2</sub>), 6.25 (d, 1H, vinylic proton), 7.36 (d, 2 arom H), 7.39-7.57 (m, 5 arom H), 7.76 (d, 1H, vinylic proton), 8.15 (d, 2 arom H).

**Compound 7a:** As for **7b** from **6a**. Purification of the residue by CC (CH<sub>2</sub>Cl<sub>2</sub>) gave pure **7a** (95%, oil). <sup>1</sup>H RMN (200 MHz, acetone-d<sub>6</sub>): δ = 0.85 (t, 3H, CH<sub>3</sub>), 0.89 (t, 3H, CH<sub>3</sub>), 1.20-1.70 (m, 24H, 12 x CH<sub>2</sub>), 2.29 (t, 2H, CH<sub>2</sub>Cp), 2.43 (t, 2H, CH<sub>2</sub>Cp(substituted by the vinylic function)), 3.98-4.11 (m, 4H, H-Cp), 4.43 (m, 1H, H-Cp), 4.59 (m, 2H, H-Cp), 5.40 (s, 2H, CO<sub>2</sub>CH<sub>2</sub>), 6.23 (d, 1H, vinylic proton), 7.34 (d, 2 arom H), 7.35-7.55 (m, 5 arom H), 7.74 (d, 1H, vinylic proton), 8.13 (d, 2 arom H).

**Compound 7c:** As for **7b** from **6c**. Purification of the residue by CC (CH<sub>2</sub>Cl<sub>2</sub>/AcOEt 40:1) gave pure **7c** (66%, oil). <sup>1</sup>H RMN (200 MHz, acetone-d<sub>6</sub>): δ = 0.89 (t, 3H, CH<sub>3</sub>), 0.90 (t, 3H, CH<sub>3</sub>), 1.20-1.45 (m, 36H, 18 x CH<sub>2</sub>), 1.45-1.65 (m, 4H, CH<sub>2</sub>CH<sub>2</sub>Cp), 2.27-2.35 (m, 2H, CH<sub>2</sub>Cp), 2.41-2.48 (m, 2H, CH<sub>2</sub>Cp(substituted by the vinylic function)), 4.01-4.13 (m, 4H, H-Cp), 4.45-4.47 (m, 1H, H-Cp), 4.60-4.61 (m, 2H, H-Cp), 5.42 (s, 2H, CO<sub>2</sub>CH<sub>2</sub>), 6.25 (d, 1H, vinylic proton), 7.36 (d, 2 arom H), 7.40-7.57 (m, 5 arom H), 7.76 (d, 1H, vinylic proton), 8.15 (d, 2 arom H).

**Compound 8b:** A mixture of **7b** (2.45 g, 3.41 mmol), Pd(10%)/C (0.25 g) and CH<sub>2</sub>Cl<sub>2</sub> (100 mL) was stirred at room temperature under 4 bar of H<sub>2</sub> for 5h. The mixture was filtered through celite and the solvent evaporated to dryness. Purification of the residue by

crystallization (methanol) gave pure **8b** (2.03 g, 90%). Mp = 64°C. <sup>1</sup>H RMN (200 MHz, acetone-d<sub>6</sub>): δ = 0.90 (t, 6H, CH<sub>3</sub>), 1.20-1.35 (m, 28H, 14 x CH<sub>2</sub>), 1.45-1.62 (m, 4H, CH<sub>2</sub>CH<sub>2</sub>Cp), 2.31-2.43 (m, 4H, CH<sub>2</sub>Cp), 2.72-2.92 (m, 4H, CpCH<sub>2</sub>CH<sub>2</sub>CO<sub>2</sub>), 3.96-4.03 (m, 7H, H-Cp), 7.27 (d, 2 arom H), 8.11 (d, 2 arom H). Anal. Calcd for C<sub>40</sub>H<sub>58</sub>O<sub>4</sub>Fe (658.73) : C, 72.93; H, 8.87. Found: C, 72.94; H, 8.90.

**Compound 8a:** As for **8b** from **7a**. Purification of the residue by CC (CH<sub>2</sub>Cl<sub>2</sub>/MeOH 100:1) gave pure **8a** (89%). Mp = 48°C. <sup>1</sup>H RMN (400 MHz, acetone-d<sub>6</sub>): δ = 0.89 (t, 6H, CH<sub>3</sub>), 1.25-1.45 (m, 20H, 10 x CH<sub>2</sub>), 1.63 (m, 4H, CH<sub>2</sub>CH<sub>2</sub>Cp), 2.40-2.49 (m, 4H, CH<sub>2</sub>Cp), 2.80-3.00 (m, 4H, CpCH<sub>2</sub>CH<sub>2</sub>CO<sub>2</sub>), 4.09-4.16 (m, 7H, H-Cp), 7.36 (d, 2 arom H), 8.20 (d, 2 arom H). Anal. Calcd for C<sub>36</sub>H<sub>50</sub>O<sub>4</sub>Fe (602.64) : C, 71.75; H, 8.36. Found: C, 71.87; H, 8.48.

**Compound 8c:** As for **8b** from **7c**. Purification of the residue by crystallization (methanol) gave pure **8c** (92%). Mp = 53°C. <sup>1</sup>H RMN (200 MHz, acetone-d<sub>6</sub>): δ = 0.90 (t, 6H, CH<sub>3</sub>), 1.25-1.45 (m, 36H, 18 x CH<sub>2</sub>), 1.45-1.62 (m, 4H, CH<sub>2</sub>CH<sub>2</sub>Cp), 2.31-2.43 (m, 4H, CH<sub>2</sub>Cp), 2.72-2.92 (m, 4H, CpCH<sub>2</sub>CH<sub>2</sub>CO<sub>2</sub>), 3.97-4.03 (m, 7H, H-Cp), 7.27 (d, 2 arom H), 8.11 (d, 2 arom H). Anal. Calcd for C<sub>44</sub>H<sub>66</sub>O<sub>4</sub>Fe (714.84) : C, 73.93; H, 9.31. Found: C, 73.90; H, 9.30.

**Compounds 1a-c and 2a-c:** A solution of the corresponding acid (30 mmol) and stilbazole (30 mmol) in THF (4 mL) was stirred at room temperature for 30 min. The solvent was then slowly evaporated under vacuum and the residue dried for 24h under vacuum. Anal. Calcd for C<sub>55</sub>H<sub>73</sub>FeNO<sub>5</sub> (884.03) (**1a**): C, 74.73; H, 8.32; N, 1.58. Found: C, 74.75; H, 8.44; N, 1.63. Anal. Calcd for C<sub>59</sub>H<sub>81</sub>FeNO<sub>5</sub> (940.14) (**1b**): C, 75.38; H, 8.68; N, 1.49. Found: C, 75.16; H, 8.72; N, 1.46. Anal. Calcd for C<sub>63</sub>H<sub>89</sub>FeNO<sub>5</sub> (996.25) (**1c**): C, 75.95; H, 9.00; N, 1.41. Found: C, 76.10; H, 8.89; N, 1.49. Anal. Calcd for C<sub>59</sub>H<sub>81</sub>FeNO<sub>5</sub> (940.14) (**2a**): C, 75.38; H, 8.68; N, 1.49. Found: C, 75.31; H, 8.77; N, 1.56. Anal. Calcd for C<sub>63</sub>H<sub>89</sub>FeNO<sub>5</sub> (996.25) (**2b**): C, 75.95; H, 9.00; N, 1.41. Found: C, 75.80; H, 8.83; N, 1.46. Anal. Calcd for C<sub>67</sub>H<sub>97</sub>FeNO<sub>5</sub> (1052.35) (**2c**): C, 76.47; H, 9.29; N, 1.33. Found: C, 76.50; H, 9.21; N, 1.44.
